# Supplementary material
Source: PubMed Central journal article supplement (PMC11027603)
Supplement: 262_2020_2575_MOESM2_ESM.pdf [file 262_2020_2575_MOESM2_ESM.pdf]

# INGENUITY<sup>®</sup>

## PATHWAY ANALYSIS

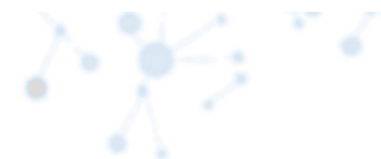

Analysis Name: PCNSL\_vs\_M\_FC2.5\_FDR\_0.05\_subset\_177-refined - 2018-02-26 03:35 PM

Analysis Creation Date: 2018-02-26

Build version: 463341M

Content version: 42012434 (Release Date: 2017-12-07)

### Top Canonical Pathways

| Name                                                                           | p-value  | Overlap      |
|--------------------------------------------------------------------------------|----------|--------------|
| Role of Macrophages, Fibroblasts and Endothelial Cells in Rheumatoid Arthritis | 6.77E-05 | 3.2 % 10/312 |
| IL-8 Signaling                                                                 | 7.26E-05 | 4.1 % 8/197  |
| Estrogen-Dependent Breast Cancer Signaling                                     | 2.26E-04 | 6.3 % 5/79   |
| Erythropoietin Signaling                                                       | 2.54E-04 | 6.2 % 5/81   |
| Macropinocytosis Signaling                                                     | 2.54E-04 | 6.2 % 5/81   |

### Top Upstream Regulators

| Upstream Regulator | p-value of overlap | Predicted Activation |
|--------------------|--------------------|----------------------|
| CSF2               | 9.25E-06           |                      |
| AHR                | 4.99E-05           |                      |
| TGFBR1             | 5.54E-05           | Inhibited            |
| IKZF1              | 1.37E-04           |                      |
| Cg                 | 1.88E-04           |                      |

### Top Diseases and Bio Functions

#### Diseases and Disorders

| Name   | p-value             | #Molecules |
|--------|---------------------|------------|
| Cancer | 5.66E-03 - 2.25E-11 | 149        |

|                                     |                     |     |
|-------------------------------------|---------------------|-----|
| Organismal Injury and Abnormalities | 5.66E-03 - 2.25E-11 | 149 |
| Inflammatory Response               | 5.62E-03 - 3.23E-08 | 61  |
| Gastrointestinal Disease            | 5.40E-03 - 8.16E-07 | 139 |
| Connective Tissue Disorders         | 4.47E-03 - 2.08E-06 | 46  |

### Molecular and Cellular Functions

| Name                              | p-value             | #Molecules |
|-----------------------------------|---------------------|------------|
| Cellular Movement                 | 5.40E-03 - 3.63E-08 | 45         |
| Cellular Function and Maintenance | 5.37E-03 - 2.21E-07 | 48         |
| Cellular Development              | 5.40E-03 - 7.61E-07 | 57         |
| Cellular Growth and Proliferation | 5.40E-03 - 7.61E-07 | 60         |
| Cell Death and Survival           | 5.40E-03 - 1.21E-06 | 54         |

### Physiological System Development and Function

| Name                                          | p-value             | #Molecules |
|-----------------------------------------------|---------------------|------------|
| Hematological System Development and Function | 5.60E-03 - 2.13E-09 | 55         |
| Tissue Morphology                             | 5.60E-03 - 2.13E-09 | 52         |
| Immune Cell Trafficking                       | 5.40E-03 - 3.63E-08 | 33         |
| Hematopoiesis                                 | 5.37E-03 - 7.61E-07 | 27         |
| Lymphoid Tissue Structure and Development     | 5.60E-03 - 7.61E-07 | 44         |

### Top Tox Functions

#### Assays: Clinical Chemistry and Hematology

| Name                           | p-value             | #Molecules |
|--------------------------------|---------------------|------------|
| Increased Levels of Hematocrit | 4.53E-03 - 4.53E-03 | 4          |
| Increased Levels of Creatinine | 5.07E-03 - 5.07E-03 | 3          |
| Decreased Levels of Albumin    | 8.03E-02 - 8.03E-02 | 1          |

|                                         |                     |   |
|-----------------------------------------|---------------------|---|
| Increased Levels of Blood Urea Nitrogen | 1.18E-01 - 1.18E-01 | 1 |
| Increased Levels of Red Blood Cells     | 1.58E-01 - 1.58E-01 | 2 |

**Cardiotoxicity**

| Name                     | p-value             | #Molecules |
|--------------------------|---------------------|------------|
| Cardiac Inflammation     | 2.07E-02 - 1.52E-03 | 4          |
| Cardiac Dilation         | 3.38E-01 - 6.95E-03 | 6          |
| Congenital Heart Anomaly | 3.38E-01 - 6.95E-03 | 2          |
| Cardiac Hypoplasia       | 9.93E-02 - 2.75E-02 | 2          |
| Cardiac Infarction       | 8.67E-02 - 3.58E-02 | 5          |

**Hepatotoxicity**

| Name                                 | p-value             | #Molecules |
|--------------------------------------|---------------------|------------|
| Liver Damage                         | 3.99E-01 - 2.08E-04 | 5          |
| Liver Inflammation/Hepatitis         | 3.99E-01 - 2.47E-04 | 11         |
| Liver Hyperplasia/Hyperproliferation | 2.22E-01 - 5.39E-03 | 95         |
| Liver Necrosis/Cell Death            | 2.62E-01 - 1.50E-02 | 6          |
| Liver Steatosis                      | 2.44E-01 - 5.42E-02 | 6          |

**Nephrotoxicity**

| Name                      | p-value             | #Molecules |
|---------------------------|---------------------|------------|
| Renal Damage              | 3.04E-01 - 2.27E-03 | 6          |
| Renal Tubule Injury       | 4.74E-03 - 4.74E-03 | 2          |
| Renal Dysfunction         | 2.07E-02 - 1.01E-02 | 2          |
| Renal Necrosis/Cell Death | 4.20E-01 - 1.29E-02 | 8          |
| Renal Proliferation       | 1.56E-01 - 2.07E-02 | 3          |

### Top Regulator Effect Networks

| ID | Regulators | Diseases & Functions                                       | Consistency Score |
|----|------------|------------------------------------------------------------|-------------------|
| 1  | TNF        | Cell death of macrophages (+5 more)                        | 6.425             |
| 2  | IL4,TGFBR1 | Adhesion of blood cells,Binding of myeloid cells (+5 more) | 6.325             |
| 3  | TNF        | Edema                                                      | -5.367            |
| 4  | TGM2       | Production of reactive oxygen species                      | -7.506            |

### Top Networks

| ID | Associated Network Functions                                                                                | Score |
|----|-------------------------------------------------------------------------------------------------------------|-------|
| 1  | Hematological System Development and Function, Lymphoid Tissue Structure and Development, Tissue Morphology | 43    |
| 2  | Hair and Skin Development and Function, Cellular Movement, Developmental Disorder                           | 38    |
| 3  | Cellular Development, Cellular Growth and Proliferation, Hematological System Development and Function      | 36    |
| 4  | Cell Death and Survival, Organismal Injury and Abnormalities, Embryonic Development                         | 20    |
| 5  | Protein Synthesis, Lipid Metabolism, Molecular Transport                                                    | 18    |

### Top Tox Lists

| Name                                       | p-value  | Overlap     |
|--------------------------------------------|----------|-------------|
| <a href="#">Increases Liver Hepatitis</a>  | 1.00E-05 | 8.5 % 6/71  |
| <a href="#">Increases Renal Damage</a>     | 4.81E-04 | 5.4 % 5/93  |
| <a href="#">Hepatic Cholestasis</a>        | 9.87E-04 | 3.7 % 6/163 |
| <a href="#">Increases Cardiac Dilation</a> | 2.50E-03 | 7.7 % 3/39  |
| <a href="#">NF-B Signaling</a>             | 2.92E-03 | 2.6 % 7/271 |

### Top Analysis-Ready Molecules

#### Expr Fold Change up-regulated

| Molecules       | Expr. Value | Expr. Chart |
|-----------------|-------------|-------------|
| <b>ADORA3*</b>  | ↑ 45.085    |             |
| <b>CDH19*</b>   | ↑ 27.167    |             |
| <b>CDHR3</b>    | ↑ 11.250    |             |
| <b>ABCG2</b>    | ↑ 11.101    |             |
| <b>CCDC88A*</b> | ↑ 10.694    |             |
| <b>BCL7A*</b>   | ↑ 10.267    |             |
| <b>LGR4</b>     | ↑ 9.063     |             |
| <b>GATM*</b>    | ↑ 8.764     |             |
| <b>GNAS</b>     | ↑ 7.618     |             |
| <b>PHGDH</b>    | ↑ 7.466     |             |

**Expr Fold Change down-regulated**

| Molecules       | Expr. Value | Expr. Chart |
|-----------------|-------------|-------------|
| <b>PAPLN</b>    | ↓ -20.407   |             |
| <b>CLMP*</b>    | ↓ -19.831   |             |
| <b>MRC1</b>     | ↓ -18.930   |             |
| <b>PRKCQ*</b>   | ↓ -15.617   |             |
| <b>PDE3B*</b>   | ↓ -14.861   |             |
| <b>XCR1</b>     | ↓ -14.392   |             |
| <b>FMO2*</b>    | ↓ -13.807   |             |
| <b>CRISPLD2</b> | ↓ -13.422   |             |
| <b>PLVAP</b>    | ↓ -13.236   |             |
| <b>GAS1</b>     | ↓ -13.201   |             |
